# Supplementary material for: Positively charged mineral surfaces promoted the accumulation of organic intermediates at the origin of metabolism
Source: PLOS journal article supplement (doi:10.1371/journal.pcbi.1010377), 2022-08-17
Supplement: S2 (10.1371/journal.pcbi.1010377.s002) [file journal.pcbi.1010377.s002]

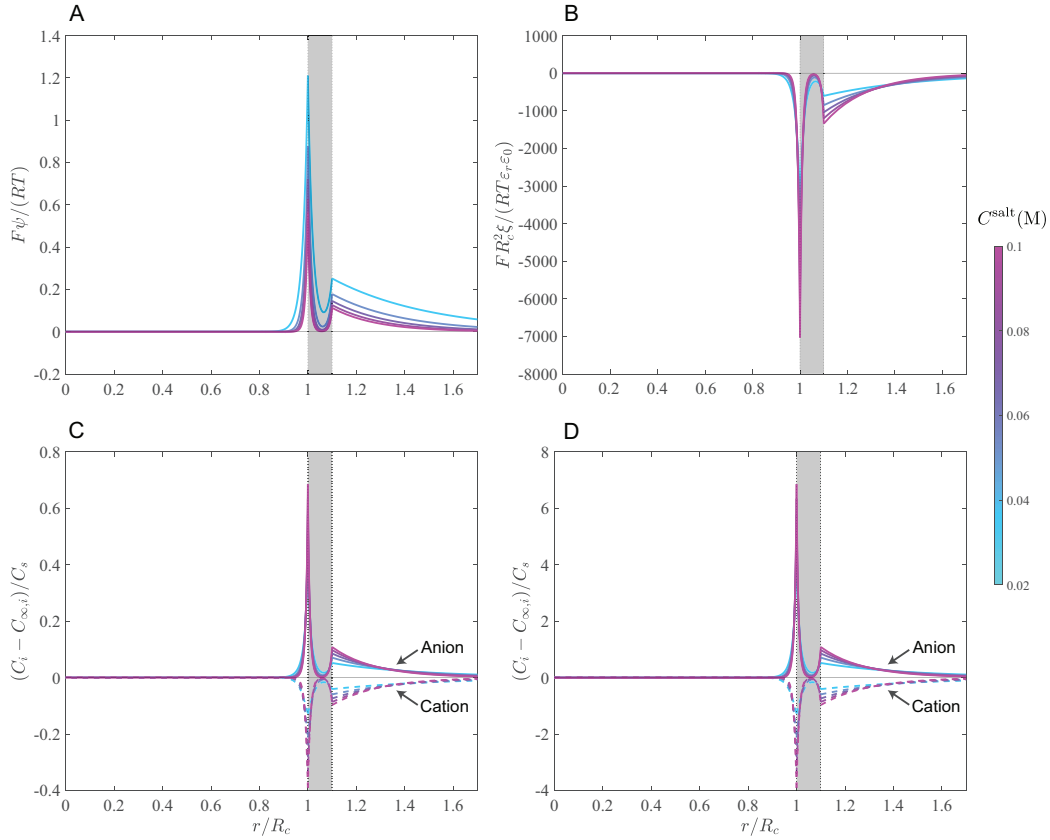

Figure S2: Steady-state solutions of species mass-balance and Maxwell's first equations at  $R_c = 10^{-7}$  m,  $\sigma = 0.01$  C/m<sup>2</sup>, and  $\sigma_r = 0.2$ . (A) Electric potential, (B) volume-charge density, (C) concentration of cations and anions associated with salt-I, and (D) concentration of cations and anions associated with salt-II. Here,  $C_{\infty,i}$  denotes the far-field concentration of ion  $i$  in the ocean, arising from dissociation of the respect salt in water. Shaded areas indicate the position of the membrane along the  $r$ -axis. The scale on the  $r$ -axis, where the ocean lies, is stretched by a factor 20 to better show radial profiles.
