# Supplementary material for: Positively charged mineral surfaces promoted the accumulation of organic intermediates at the origin of metabolism
Source: PLOS journal article supplement (doi:10.1371/journal.pcbi.1010377), 2022-08-17
Supplement: S4 (10.1371/journal.pcbi.1010377.s004) [file file]

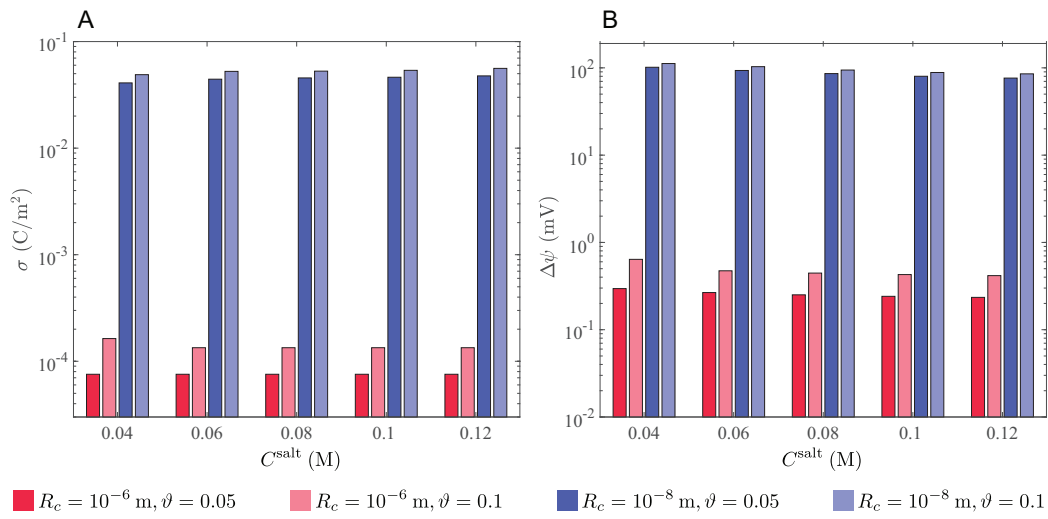

Figure S4: Stability limits along steady-state solution branches of Fig 3 in the positive orthant. (A) surface-charge density, at which stability is lost. (B) Membrane potential, at which stability is lost.
